# Supplementary material
Source: publisher site journal article supplement (https://www.dovepress.com/get_supplementary_file.php?f=+307996.docx)
Supplement: Supplementary file 1 [file get_supplementary_file.php]

**SUPPLEMENTS**

**sTable 1**. Comparisons between insomnia symptoms and non-insomnia symptoms individuals on demographic data, COVID-19 related data and psychological status. (Using the cut-off of ≥10 for ISI)

|  | Insomnia symptoms  (n=3187) | Non-insomnia symptoms  (n=11707) | χ2 | P |
| --- | --- | --- | --- | --- |
| **Demography** |  |  |  |  |
| Gender |  |  | 43.538 | <0.001 |
| Male | 1526(41.0%) | 4842(41.4%) |  |  |
| Female | 1661(52.1%) | 6865(58.6%) |  |  |
| Ethnicity |  |  | 15.782 | <0.001 |
| Han | 3009(94.4%) | 11242(96.0%) |  |  |
| Minority | 178(5.6%) | 465(4.0%) |  |  |
| Age (years old) |  |  | 14.878 | <0.001 |
| 18~40 | 2229(69.9%) | 7764(66.3%) |  |  |
| >40 | 958(30.1%) | 3943(33.7%) |  |  |
| Education level |  |  | 4.575 | 0.032 |
| High School or below | 705(22.1%) | 2802(23.9%) |  |  |
| Bachelor or above | 2482(77.9%) | 8905(76.1%) |  |  |
| City lived in the past month |  |  | 20.627 | <0.001 |
| Wuhan | 128(4.0%) | 294(2.5%) |  |  |
| City in Hubei Province except Wuhan | 457(14.3%) | 1697(14.5%) |  |  |
| City outside of Hubei Province | 2602(81.6%) | 9719(83.0%) |  |  |
| Medical history |  |  | 936.107 | <0.001 |
| None | 2560(80.3%) | 11136(95.1%) |  |  |
| Physical diseases | 174(5.5%) | 346(3.0%) |  |  |
| Psychiatric disorders | 453(14.2%) | 225(1.9%) |  |  |
| Alcohol use |  |  | 160.571 | <0.001 |
| Never | 1695(53.2%) | 7639(65.3%) |  |  |
| Less than 1 time per week | 1291(40.5%) | 3600(30.8%) |  |  |
| At least 2 times per week | 201(6.3%) | 468(4.0%) |  |  |
| Smoking |  |  | 118.552 | <0.001 |
| No | 2546(79.9%) | 10240(87.5%) |  |  |
| Yes | 641(20.1%) | 1467(12.5%) |  |  |
| **COVID-19 epidemic-related questions** | |  |  |  |
| Suspected or confirmed infected with COVID-19 | | | 231.836 | <0.001 |
| None | 2990(93.8%) | 11536(98.5%) |  |  |
| Suspected | 185(5.8%) | 162(1.4%) |  |  |
| Confirmed | 12(0.4%) | 9(0.1%) |  |  |
| Anyone around confirmed infected with COVID-19 | | | 391.556 | <0.001 |
| None | 2716(85.2%) | 11081(94.7%) |  |  |
| Family | 70(2.2%) | 97(0.8%) |  |  |
| Friends or colleagues | 150(4.7%) | 95(0.8%) |  |  |
| Neighborhood or community | 251(7.9%) | 434(3.7%) |  |  |
| Family relationship |  |  | 265.808 | <0.001 |
| Became estranged | 275(8.6%) | 318(2.7%) |  |  |
| Not changed | 1751(54.9%) | 6122(52.3%) |  |  |
| Became closer | 1161(36.4%) | 5267(45.0%) |  |  |
| Feeling alienated from others |  |  | 611.110 | <0.001 |
| Yes | 604(19.0%) | 1005(8.6%) |  |  |
| Neutral | 1288(40.4%) | 3238(27.7%) |  |  |
| No | 1295(40.6%) | 7464(63.8%) |  |  |
| Satisfaction of available information | |  | 389.324 | <0.001 |
| Dissatisfied | 381(12.0%) | 787(6.7%) |  |  |
| Neutral | 1567(49.2%) | 4112(35.1%) |  |  |
| Satisfied | 1239(38.9%) | 6808(58.2%) |  |  |
| **Psychological Status** |  |  |  |  |
| Having somatic symptoms (SSS-8) | |  | 2629.746 | <0.001 |
| No (0~3) | 523(16.4%) | 7870(67.2%) |  |  |
| Yes (4~32) | 2664(83.6%) | 3837(32.8%) |  |  |
| Having depressive symptoms (PHQ-9) | |  | 3484.356 | <0.001 |
| No (0~4) | 385(12.1%) | 8232(70.3%) |  |  |
| Yes(5~27) | 2802(87.9%) | 3475(29.7%) |  |  |
| Having psychological distress (IES-R) | |  | 1708.992 | <0.001 |
| No (0~8) | 318(10.0%) | 5941(50.7%) |  |  |
| Yes (9~88) | 2869(90.0%) | 5766(49.3%) |  |  |

**sTable 2**. Binary logistic regression analysis of insomnia symptoms-related factors (Using the cut-off of ≥10 for ISI)

|  | Adjusted  ORs | P | 95% C.I. |
| --- | --- | --- | --- |
| **Demographic factors** |  |  |  |
| Gender (ref: Male) |  |  |  |
| Female | 0.83 | 0.001 | 0.75-0.93 |
| Ethnicity (ref: Han) |  |  |  |
| Minority | 1.35 | 0.011 | 1.07-1.70 |
| Medical History (ref: None) |  |  |  |
| Physical diseases | 1.39 | 0.004 | 1.11-1.75 |
| Psychiatric disorders | 2.70 | <0.001 | 2.22-3.29 |
| Smoking (ref: No) |  |  |  |
| Yes | 1.452 | <0.001 | 1.32-1.76 |
| **COVID-19 epidemic-related factors** |  |  |  |
| Anyone around confirmed infected with COVID-19 (ref: None) | | | |
| Family | 1.11 | 0.608 | 0.75-1.64 |
| Friends or colleagues | 1.63 | 0.004 | 1.17-2.27 |
| Neighborhood or community | 1.52 | 0.094 | 0.97-1.45 |
| Family relationship (ref: Neutral) |  |  |  |
| Became estranged | 1.33 | 0.008 | 1.08-1.64 |
| Became closer | 0.89 | 0.027 | 0.80-0.99 |
| Feeling alienated from others (ref: Neutral) |  |  |  |
| Yes | 1.13 | 0.095 | 0.98-1.34 |
| No | 0.79 | <0.001 | 0.71-0.88 |
| Satisfaction of available information (ref: Neutral) |  |  |  |
| Dissatisfied | 1.14 | 0.146 | 0.96-1.36 |
| Satisfied | 0.72 | <0.001 | 0.65-0.80 |
| **Psychological factors** |  |  |  |
| Having somatic symptoms (ref: No) |  |  |  |
| Yes | 3.48 | <0.001 | 3.10-3.90 |
| Having depressive symptoms (ref: No) |  |  |  |
| Yes | 5.95 | <0.001 | 5.23-6.76 |
| Having psychological distress (ref: No) |  |  |  |
| Yes | 2.79 | <0.001 | 2.42-3.20 |

**sTable 3**. Unadjusted regression analysis of risk factors for symptoms of insomnia

|  | Crude ORs | P | 95% C.I. | |
| --- | --- | --- | --- | --- |
| **Demographic factors** |  |  |  | |
| Gender (ref: Male) |  |  |  | |
| Female | 0.79 | <0.001 | 0.74-0.85 | |
| Ethnicity (ref: Han) |  |  |  | |
| Minority | 1.26 | 0.006 | 1.07-1.49 | |
| Age (ref:18-40) |  |  |  | |
| >40 | 0.88 | 0.001 | 0.82-0.96 | |
| Education level (ref: High School or below) |  |  |  | |
| Bachelor or above | 1.20 | <0.001 | 1.10-1.31 | |
| City lived in the past month (ref: City outside of Hubei Province) |  |  |  | |
| Wuhan | 1.56 | <0.001 | 1.28-1.90 | |
| City in Hubei Province except Wuhan | 1.05 | 0.321 | 0.95-1.16 | |
| Medical History (ref: None) |  |  |  |  |
| Physical diseases | 2.01 | <0.001 | 1.68-2.40 | |
| Psychiatric disorders | 10.07 | <0.001 | 8.32-12.18 | |
| Alcohol use (ref: Never) |  |  |  | |
| Less than 1 time per week | 1.62 | <0.001 | 1.51-1.75 | |
| At least 2 times per week | 1.79 | <0.001 | 1.52-2.10 | |
| Smoking (ref: No) |  |  |  | |
| Yes | 1.63 | <0.001 | 1.48-1.79 | |
| **COVID-19 epidemic-related factors** |  |  |  | |
| Suspected or confirmed infected with COVID-19 (ref: None) |  |  |  | |
| Suspected | 4.53 | <0.001 | 3.62-5.67 | |
| Confirmed | 5.84 | <0.001 | 2.26-15.05 | |
| Anyone around confirmed infected with COVID-19 (ref: None) | | | | |
| Family | 3.15 | <0.001 | 2.32-4.29 | |
| Friends or colleagues | 6.50 | <0.001 | 4.90-8.63 | |
| Neighborhood or community | 2.22 | <0.001 | 1.90-2.59 | |
| Family relationship (ref: Neutral) |  |  |  | |
| Became estranged | 3.13 | <0.001 | 2.64-3.71 | |
| Became closer | 0.76 | <0.001 | 0.70-0.82 | |
| Feeling alienated from others (ref: Neutral) |  |  |  | |
| Yes | 1.40 | <0.001 | 1.25-1.57 | |
| No | 0.43 | <0.001 | 0.40-0.47 | |
| Satisfaction of available information (ref: Neutral) |  |  |  | |
| Dissatisfied | 1.17 | 0.019 | 1.03-1.32 | |
| Satisfied | 0.47 | <0.001 | 0.44-0.51 | |
| **Psychological factors** |  |  |  | |
| Having somatic symptoms (ref: No) |  |  |  | |
| Yes | 9.54 | <0.001 | 8.79-10.37 | |
| Having depressive symptoms (ref: No) |  |  |  | |
| Yes | 14.94 | <0.001 | 13.67-16.32 | |
| Having psychological distress (ref: No) |  |  |  | |
| Yes | 9.17 | <0.001 | 8.32-10.11 | |
